# Supplementary material
Source: Research Square preprint supplement (doi:10.21203/rs.3.rs-9261382/v1)
Supplement: Supplementary file 1 [file 2e94ee4b2697be64f591c4e1.docx]

****Supplementary table 1. ANCOVA results for axial length elongation (ΔAL) by all groups****

| ****Intervention**** | ****n**** | ****Adjusted mean (mm)ⁱ**** | ****SE**** | ****95% CI**** | *****p* vs RLRLⁱⁱ**** |
| --- | --- | --- | --- | --- | --- |
| RLRL | 122 | 0.10 | 0.03 | 0.046 to 0.144 | Reference |
| SVS | 139 | 0.38 | 0.02 | 0.333 to 0.427 | ****<0.001**** |
| DIMS | 121 | 0.32 | 0.03 | 0.270 to 0.369 | ****<0.001**** |
| OK | 145 | 0.25 | 0.02 | 0.200 to 0.290 | ****<0.001**** |

ⁱ Adjusted for baseline axial length (covariate value: 24.38 mm).
ⁱⁱ Bonferroni‑corrected p‑values for pairwise comparisons with the RLRL group.
Overall group effect (ANCOVA): *F*₍₃,₅₂₂₎=25.692, *p<0.001*, partial *η²*=0.129.

****Supplementary table 2. ANCOVA results for SER progression (ΔSER) by all groups****

| **Intervention** | **n** | **Adjusted mean (D)ⁱ** | **SE** | **95% CI** | ***p* vs RLRLⁱⁱ** |
| --- | --- | --- | --- | --- | --- |
| RLRL | 122 | -0.17 | 0.05 | -0.263 to -0.072 | Reference |
| SVS | 139 | -0.85 | 0.05 | -0.935 to -0.756 | ****<0.001**** |
| DIMS | 121 | -0.57 | 0.05 | -0.661 to -0.468 | ****<0.001**** |

ⁱ Adjusted for baseline spherical equivalent refraction (covariate value: -2.10 D).
ⁱⁱ Bonferroni‑corrected p‑values for pairwise comparisons with the RLRL group.
Overall group effect (ANCOVA): *F*₍₂,₃₇₈₎=51.871, *p<0.001*, partial *η²*=0.215.

****Supplementary table 3. ANCOVA results for axial length elongation (ΔAL) by age subgroup****

| ****Subgroup**** | ****Intervention**** | ****n**** | ****Adjusted mean (mm)**** | ****SE**** | ****95% CI**** | *****p* vs RLRLⁱ**** |
| --- | --- | --- | --- | --- | --- | --- |
| Age ≤9 years | RLRL | 70 | 0.11 | 0.03 | 0.049 to 0.176 | Reference |
|  | SVS | 61 | 0.44 | 0.04 | 0.365 to 0.510 | ****<0.001**** |
|  | DIMS | 48 | 0.32 | 0.04 | 0.245 to 0.400 | ****<0.001**** |
|  | OK | 64 | 0.27 | 0.03 | 0.201 to 0.336 | ****0.006**** |
| Age >9 years | RLRL | 52 | 0.08 | 0.04 | 0.002 to 0.154 | Reference |
|  | SVS | 78 | 0.34 | 0.03 | 0.276 to 0.402 | ****<0.001**** |
|  | DIMS | 73 | 0.31 | 0.03 | 0.248 to 0.377 | ****<0.001**** |
|  | OK | 81 | 0.22 | 0.03 | 0.162 to 0.284 | ****0.024**** |

ⁱ Bonferroni‑corrected p‑values. Overall group effects (ANCOVA): Age ≤9: *F*₍₃,₂₃₈₎=15.22, *p<0.001*; Age >9: *F*₍₃,₂₇₉₎=10.82, *p<0.001*.

****Supplementary table 4. ANCOVA results for SER progression (ΔSER) by age subgroup****

| ****Subgroup**** | ****Intervention**** | ****n**** | ****Adjusted mean (D)**** | ****SE**** | ****95% CI**** | *****p* vs RLRLⁱ**** |
| --- | --- | --- | --- | --- | --- | --- |
| Age ≤9 years | RLRL | 70 | –0.16 | 0.07 | –0.293 to –0.025 | Reference |
|  | SVS | 61 | –0.86 | 0.07 | –1.002 to –0.713 | ****<0.001**** |
|  | DIMS | 48 | –0.61 | 0.08 | –0.773 to –0.451 | ****<0.001**** |
| Age >9 years | RLRL | 52 | –0.19 | 0.07 | –0.332 to –0.047 | Reference |
|  | SVS | 78 | –0.83 | 0.06 | –0.947 to –0.717 | ****<0.001**** |
|  | DIMS | 73 | –0.53 | 0.06 | –0.650 to –0.411 | ****0.001**** |

ⁱ Bonferroni‑corrected p‑values. Overall group effects (ANCOVA): Age ≤9: *F*₍₂,₁₇₅₎=25.18, *p<0.001*; Age >9: *F*₍₂,₁₉₉₎=23.98, *p<0.001*.

****Supplementary table 5. ANCOVA results for axial length elongation (ΔAL) by myopia severity****

| ****Subgroup**** | ****Intervention**** | ****n**** | ****Adjusted mean (mm)**** | ****SE**** | ****95% CI**** | *****p* vs RLRLⁱ**** |
| --- | --- | --- | --- | --- | --- | --- |
| Mild myopia | RLRL | 94 | 0.08 | 0.03 | 0.020 to 0.131 | Reference |
| (SER ≤ –3.0 D) | SVS | 119 | 0.38 | 0.03 | 0.330 to 0.431 | ****<0.001**** |
|  | DIMS | 97 | 0.37 | 0.03 | 0.315 to 0.426 | ****<0.001**** |
|  | OK | 124 | 0.27 | 0.03 | 0.221 to 0.320 | ****<0.001**** |
| Moderate myopia | RLRL | 28 | 0.18 | 0.05 | 0.089 to 0.270 | Reference |
| (SER > –3.0 D) | SVS | 20 | 0.40 | 0.05 | 0.291 to 0.500 | ****0.012**** |
|  | DIMS | 24 | 0.06 | 0.05 | –0.036 to 0.161 | 0.579 |
|  | OK | 21 | 0.11 | 0.05 | 0.006 to 0.209 | 1.000 |

ⁱ Bonferroni‑corrected p‑values. Overall group effects (ANCOVA): Mild: *F*₍₃,₄₂₉₎=26.08, *p<0.001*; Moderate: *F*₍₃,₈₈₎=7.73, *p<0.001*.

****Supplementary table 6. ANCOVA results for SER progression (ΔSER) by myopia severity****

| ****Subgroup**** | ****Intervention**** | ****n**** | ****Adjusted mean (D)**** | ****SE**** | ****95% CI**** | *****p* vs RLRLⁱ**** |
| --- | --- | --- | --- | --- | --- | --- |
| Mild myopia | RLRL | 94 | –0.11 | 0.06 | –0.228 to 0.002 | Reference |
| (SER ≤ –3.0 D) | SVS | 119 | –0.84 | 0.05 | –0.944 to –0.743 | ****<0.001**** |
|  | DIMS | 97 | –0.63 | 0.06 | –0.739 to –0.513 | ****<0.001**** |
| Moderate myopia | RLRL | 28 | –0.30 | 0.08 | –0.458 to –0.149 | Reference |
| (SER > –3.0 D) | SVS | 20 | –0.88 | 0.09 | –1.065 to –0.697 | ****<0.001**** |
|  | DIMS | 24 | –0.35 | 0.08 | –0.520 to –0.184 | 1.000 |

ⁱ Bonferroni‑corrected p‑values. Overall group effects (ANCOVA): Mild: *F*₍₂,₃₀₆₎=45.01, *p<0.001*; Moderate: *F*₍₂,₆₈₎=13.19, *p<0.001*.****Supplementary table 7. ANCOVA results for axial length elongation (ΔAL) by gender****

| ****Subgroup**** | ****Intervention**** | ****n**** | ****Adjusted mean (mm)**** | ****SE**** | ****95% CI**** | *****p* vs RLRLⁱ**** |
| --- | --- | --- | --- | --- | --- | --- |
| Male | RLRL | 68 | 0.14 | 0.03 | 0.079 to 0.201 | Reference |
|  | SVS | 60 | 0.35 | 0.03 | 0.291 to 0.410 | ****<0.001**** |
|  | DIMS | 75 | 0.32 | 0.03 | 0.262 to 0.377 | ****<0.001**** |
|  | OK | 78 | 0.21 | 0.03 | 0.163 to 0.263 | 0.276 |
| Female | RLRL | 54 | 0.06 | 0.04 | –0.013 to 0.134 | Reference |
|  | SVS | 79 | 0.44 | 0.03 | 0.375 to 0.499 | ****<0.001**** |
|  | DIMS | 46 | 0.27 | 0.04 | 0.185 to 0.350 | ****<0.001**** |
|  | OK | 67 | 0.25 | 0.04 | 0.181 to 0.318 | ****0.003**** |

ⁱ Bonferroni‑corrected p‑values. Overall group effects (ANCOVA): Male: *F*₍₃,₂₇₇₎=12.28, *p<0.001*; Female: *F*₍₃,₂₄₂₎=17.35, *p<0.001*.

****Supplementary table 8. ANCOVA results for SER progression (ΔSER) by gender****

| ****Subgroup**** | ****Intervention**** | ****n**** | ****Adjusted mean (D)**** | ****SE**** | ****95% CI**** | *****p* vs RLRLⁱ**** |
| --- | --- | --- | --- | --- | --- | --- |
| Male | RLRL | 68 | –0.22 | 0.06 | –0.341 to –0.098 | Reference |
|  | SVS | 60 | –0.88 | 0.07 | –1.012 to –0.746 | ****<0.001**** |
|  | DIMS | 75 | –0.57 | 0.06 | –0.684 to –0.452 | ****<0.001**** |
| Female | RLRL | 54 | –0.11 | 0.07 | –0.254 to 0.030 | Reference |
|  | SVS | 79 | –0.82 | 0.06 | –0.945 to –0.699 | ****<0.001**** |
|  | DIMS | 46 | –0.55 | 0.08 | –0.706 to –0.397 | ****<0.001**** |

ⁱ Bonferroni‑corrected p‑values. Overall group effects (ANCOVA): Male: *F*₍₂,₂₀₀₎=24.10, *p<0.001*; Female: *F*₍₂,₁₇₆₎=22.38, *p<0.001*.
